# Supplementary material for: The Canadian Joint Replacement Registry—what have we learned?
Source: PubMed Central journal article supplement (PMC2856215; doi:10.3109/17453671003685467), 2010-03-31
Supplement: ORT-1745-3674-81-119-s3790.pdf [file ORT-1745-3674-81-119-s3790.pdf]

For CIHI use only

Unique Identifier

Addressograph

## CANADIAN JOINT REPLACEMENT REGISTRY

### *Knee Replacement Data Collection Form*

Surgeon First Name

Surgeon Last Name

**Has Patient Consent Been Obtained?**    Yes    No

If no, please complete only surgeon first/last name and hospital name, and forward to CIHI.

Patient First Name Middle Initial Patient Last Name

Provincial Health Card Number

Birth Date: 



  
 Province Code


  
 Home Postal Code:

Gender:    Male    Female  
 Height (cm): 

 • 
  
 Weight (kg): 


 •

Hospital Chart Number: 










  
 Hospital Province:

Hospital Name: \_\_\_\_\_

Surgery Date: 



  
 Admission Date (if different from surgery date):

**Wait Time Information**

Date of First Consult (New Patients Only):
 



  
 Referral Date (New Patients Only):

Date of Decision for Surgery (All Patients):

Please Complete This Form by Checking (✓) the Appropriate Box (es)

|                                                                            |                                                                                                                                                                                                                                                                                                                                                                                                                                                                                                                                                                                                                                                        |
|----------------------------------------------------------------------------|--------------------------------------------------------------------------------------------------------------------------------------------------------------------------------------------------------------------------------------------------------------------------------------------------------------------------------------------------------------------------------------------------------------------------------------------------------------------------------------------------------------------------------------------------------------------------------------------------------------------------------------------------------|
| <b>Side (Location)</b>                                                     | <i>If bilateral, complete ONE form PER SIDE</i><br>Unilateral <input type="checkbox"/> Right <input type="checkbox"/> Left                          Bilateral <input type="checkbox"/> Right <input type="checkbox"/> Left                                                                                                                                                                                                                                                                                                                                                                                                                             |
| <b>Type of Replacement</b>                                                 | <i>Check ONE only:</i><br><input type="checkbox"/> Primary <input type="checkbox"/> R1 <input type="checkbox"/> R2 <input type="checkbox"/> R3 <input type="checkbox"/> >R3 <input type="checkbox"/> Excision (not a revision)                                                                                                                                                                                                                                                                                                                                                                                                                         |
| <b>Diagnosis Grouping</b><br><small>(for primary replacement only)</small> | <i>Check MOST RESPONSIBLE diagnosis to involved knee:</i><br><input type="checkbox"/> Degenerative OA <input type="checkbox"/> Inflammatory Arthritis <input type="checkbox"/> Post Traumatic OA <input type="checkbox"/> Osteonecrosis<br><input type="checkbox"/> Infection <input type="checkbox"/> Tumour <input type="checkbox"/> Acute fracture <input type="checkbox"/> Other _____                                                                                                                                                                                                                                                             |
| <b>Reason(s) for Revision</b><br><input type="checkbox"/> N/A or → ↓       | <i>Check ALL that apply to involved knee:</i><br><input type="checkbox"/> Aseptic Loosening <input type="checkbox"/> Infection—Single Stage <input type="checkbox"/> Implant Fracture <input type="checkbox"/> Poly Wear <input type="checkbox"/> Instability<br><input type="checkbox"/> Pain of Unknown Origin <input type="checkbox"/> Infection—Two Stage <input type="checkbox"/> Bone Fracture <input type="checkbox"/> Osteolysis <input type="checkbox"/> Unispace<br><input type="checkbox"/> Unresurfaced Patella <input type="checkbox"/> Patella Maltracking <input type="checkbox"/> Patella Failure <input type="checkbox"/> Other _____ |
| <b>Previous Operations</b><br><input type="checkbox"/> None or → ↓         | <i>Check ALL that apply to involved knee:</i><br><input type="checkbox"/> Total Knee Arthroplasty <input type="checkbox"/> Unicompartamental Arthroplasty <input type="checkbox"/> Tibial Osteotomy <input type="checkbox"/> Femoral Osteotomy<br><input type="checkbox"/> Open Meniscectomy <input type="checkbox"/> Arthroscopic Meniscectomy <input type="checkbox"/> Patellectomy <input type="checkbox"/> Ligament Repair<br><input type="checkbox"/> Fracture Fixation <input type="checkbox"/> Arthroscopic Debridement <input type="checkbox"/> Other _____                                                                                    |
| <b>Joint Deformity</b><br><input type="checkbox"/> None or → ↓             | <i>Check ALL that apply to involved knee:</i><br><input type="checkbox"/> Varus <input type="checkbox"/> Valgus <input type="checkbox"/> Flexion contracture <input type="checkbox"/> If Any ≥ 15°                                                                                                                                                                                                                                                                                                                                                                                                                                                     |
| <b>Surgical Approach</b>                                                   | <i>Check APPROACH:</i><br><input type="checkbox"/> Medial Parapatellar <input type="checkbox"/> Lateral Parapatellar <input type="checkbox"/> Intravastus <input type="checkbox"/> Subvastus <input type="checkbox"/> Other _____<br><i>Minimally Invasive (MIS)?</i> <input type="checkbox"/> Yes <input type="checkbox"/> No                                                                                                                                                                                                                                                                                                                         |
| <b>Special Steps</b><br><input type="checkbox"/> None or → ↓               | <i>Check ALL that apply to involved knee:</i><br><input type="checkbox"/> Lateral Retinacular Release <input type="checkbox"/> Rectus Snip <input type="checkbox"/> Quadriceps Turndown<br><input type="checkbox"/> Tubercle Osteotomy <input type="checkbox"/> Other _____                                                                                                                                                                                                                                                                                                                                                                            |
| <b>Antibiotic Use</b>                                                      | <i>Will antibiotics be administered prophylactically?</i> <input type="checkbox"/> Yes <input type="checkbox"/> No<br><i>If yes, duration?</i> <input type="checkbox"/> ≤ 24 hours <input type="checkbox"/> > 24 hours                                                                                                                                                                                                                                                                                                                                                                                                                                 |
| <b>DVT Prevention</b>                                                      | <i>Will DVT prophylaxis be given in hospital?</i> <input type="checkbox"/> Yes <input type="checkbox"/> No<br><i>If yes, check ALL that apply:</i> <input type="checkbox"/> Warfarin <input type="checkbox"/> LMW Heparin <input type="checkbox"/> ASA <input type="checkbox"/> SC Heparin<br><input type="checkbox"/> Pneumatic Stockings <input type="checkbox"/> Foot Pump <input type="checkbox"/> Other _____                                                                                                                                                                                                                                     |
| <b>O.R. Environment</b>                                                    | <i>Check ALL that apply:</i> <input type="checkbox"/> Laminar Air Flow <input type="checkbox"/> No Laminar Air Flow <input type="checkbox"/> Body Exhaust <input type="checkbox"/> Ultraviolet                                                                                                                                                                                                                                                                                                                                                                                                                                                         |

**CANADIAN JOINT REPLACEMENT REGISTRY**

**KNEE REPLACEMENT DATA COLLECTION FORM**

|                                                                                                                                                                                        |                                                                                                                                                                                                                                                                                                                                                                                                                                                                                                                                                                                                                                                                                                                                                                                                                                                                                                                                                                                                                                                                                                                                                                                                                                                                                                                                        |                                                                                                                                                                                                                                                   |                                                                                                                                                                |               |                  |                  |                              |          |                                    |                          |            |                          |                          |                          |                          |               |                          |                          |                          |            |                          |                          |                          |                          |                          |                                                                                                                                                                                                                                          |                                                                                       |
|----------------------------------------------------------------------------------------------------------------------------------------------------------------------------------------|----------------------------------------------------------------------------------------------------------------------------------------------------------------------------------------------------------------------------------------------------------------------------------------------------------------------------------------------------------------------------------------------------------------------------------------------------------------------------------------------------------------------------------------------------------------------------------------------------------------------------------------------------------------------------------------------------------------------------------------------------------------------------------------------------------------------------------------------------------------------------------------------------------------------------------------------------------------------------------------------------------------------------------------------------------------------------------------------------------------------------------------------------------------------------------------------------------------------------------------------------------------------------------------------------------------------------------------|---------------------------------------------------------------------------------------------------------------------------------------------------------------------------------------------------------------------------------------------------|----------------------------------------------------------------------------------------------------------------------------------------------------------------|---------------|------------------|------------------|------------------------------|----------|------------------------------------|--------------------------|------------|--------------------------|--------------------------|--------------------------|--------------------------|---------------|--------------------------|--------------------------|--------------------------|------------|--------------------------|--------------------------|--------------------------|--------------------------|--------------------------|------------------------------------------------------------------------------------------------------------------------------------------------------------------------------------------------------------------------------------------|---------------------------------------------------------------------------------------|
| <b>Femoral Component</b><br><br><b>Replaced?</b><br><input type="checkbox"/> Yes →<br><br><input type="checkbox"/> No ↓                                                                | <b>Unicompartmental Prosthesis?</b><br><input type="checkbox"/> Yes <input type="checkbox"/> No<br><br><b>If yes,</b><br><input type="checkbox"/> Medial <input type="checkbox"/> Lateral <input type="checkbox"/> Patellofemoral<br><b>Cemented?</b> <input type="checkbox"/> Yes <input type="checkbox"/> No<br><b>If Cemented:</b><br>Porosity Reduction: <input type="checkbox"/> Yes <input type="checkbox"/> No<br><b>If Cementless, Check ALL that apply:</b><br><input type="checkbox"/> Porous In-growth <input type="checkbox"/> H. A. Coated<br><input type="checkbox"/> Press-fit                                                                                                                                                                                                                                                                                                                                                                                                                                                                                                                                                                                                                                                                                                                                          | <b>Manufacturer</b><br>See Legend Below<br><br>Femoral Component<br><div style="border: 1px solid black; width: 50px; height: 50px; margin: 0 auto;"></div>                                                                                       | Affix sticker(s) or catalogue and lot number beside the specific component.<br><u>Do not include stickers for screws.</u><br><br>Sticker for Femoral Component |               |                  |                  |                              |          |                                    |                          |            |                          |                          |                          |                          |               |                          |                          |                          |            |                          |                          |                          |                          |                          |                                                                                                                                                                                                                                          |                                                                                       |
| <b>Tibial Component</b><br><br><b>Replaced?</b><br><input type="checkbox"/> Yes →<br><br><input type="checkbox"/> No → ↓                                                               | <b>Unicompartmental Prosthesis?</b><br><input type="checkbox"/> Yes <input type="checkbox"/> No<br><br><b>If yes,</b><br><input type="checkbox"/> Medial <input type="checkbox"/> Lateral <input type="checkbox"/> Patellofemoral<br><b>All Polyethylene?</b> <input type="checkbox"/> Yes <input type="checkbox"/> No<br><b>Mobile Bearing?</b> <input type="checkbox"/> Yes <input type="checkbox"/> No<br><b>Cemented?</b> <input type="checkbox"/> Yes <input type="checkbox"/> No<br><b>If Cemented:</b><br>Porosity Reduction? <input type="checkbox"/> Yes <input type="checkbox"/> No<br><b>If Cementless, Check ALL that apply:</b><br><input type="checkbox"/> Porous In-growth    Screws? <input type="checkbox"/> Yes <input type="checkbox"/> No<br><input type="checkbox"/> H.A. Coated                    Screws? <input type="checkbox"/> Yes <input type="checkbox"/> No<br><input type="checkbox"/> Trabecular Metal                Screws? <input type="checkbox"/> Yes <input type="checkbox"/> No<br><b>PCL Retaining Or PCL Sacrificing</b><br><input type="checkbox"/> Standard <input type="checkbox"/> Post & Cam <input type="checkbox"/> Constrained<br><input type="checkbox"/> Medial Pivot <input type="checkbox"/> Deep Dished <input type="checkbox"/> Hinged<br><input type="checkbox"/> Medial Pivot | <b>Manufacturer</b><br>Poly Insert<br><div style="border: 1px solid black; width: 50px; height: 50px; margin: 0 auto;"></div><br><br>Tibial Base Plate<br><div style="border: 1px solid black; width: 50px; height: 50px; margin: 0 auto;"></div> | Sticker(s) for Poly (Insert)<br><br><br>Sticker(s) for Tibial Base Plate                                                                                       |               |                  |                  |                              |          |                                    |                          |            |                          |                          |                          |                          |               |                          |                          |                          |            |                          |                          |                          |                          |                          |                                                                                                                                                                                                                                          |                                                                                       |
| <b>Patellar Component</b><br><br><b>Resurfaced?</b><br><input type="checkbox"/> Yes →<br><input type="checkbox"/> No ↓                                                                 | <b>Cemented?</b> <input type="checkbox"/> Yes <input type="checkbox"/> No<br><br>Type: <input type="checkbox"/> Inset <input type="checkbox"/> Onlay                                                                                                                                                                                                                                                                                                                                                                                                                                                                                                                                                                                                                                                                                                                                                                                                                                                                                                                                                                                                                                                                                                                                                                                   | <b>Manufacturer</b><br>Patellar Component<br><div style="border: 1px solid black; width: 50px; height: 50px; margin: 0 auto;"></div>                                                                                                              | Sticker for Patellar Component                                                                                                                                 |               |                  |                  |                              |          |                                    |                          |            |                          |                          |                          |                          |               |                          |                          |                          |            |                          |                          |                          |                          |                          |                                                                                                                                                                                                                                          |                                                                                       |
| <b>Modular Stem</b><br><input type="checkbox"/> Yes →<br><input type="checkbox"/> No ↓<br><br><b>Metal Augments</b><br><input type="checkbox"/> Yes →<br><input type="checkbox"/> No ↓ | <table style="width:100%; border-collapse: collapse;"> <tr> <td style="width:30%;"></td> <td style="width:35%; text-align: center;"><b>Femoral</b></td> <td style="width:35%; text-align: center;"><b>Tibial</b></td> </tr> <tr> <td><b>Stems</b></td> <td></td> <td></td> </tr> <tr> <td>Cemented</td> <td style="text-align: center;"><input type="checkbox"/></td> <td style="text-align: center;"><input type="checkbox"/></td> </tr> <tr> <td>Cementless</td> <td style="text-align: center;"><input type="checkbox"/></td> <td style="text-align: center;"><input type="checkbox"/></td> </tr> </table> <table style="width:100%; border-collapse: collapse; margin-top: 5px;"> <tr> <td style="width:30%;"></td> <td style="width:35%; text-align: center;"><b>Femoral</b></td> <td style="width:35%; text-align: center;"><b>Tibial</b></td> </tr> <tr> <td><b>Augments</b></td> <td></td> <td></td> </tr> <tr> <td>Metal</td> <td style="text-align: center;"><input type="checkbox"/></td> <td style="text-align: center;"><input type="checkbox"/></td> </tr> <tr> <td>Trabecular metal</td> <td style="text-align: center;"><input type="checkbox"/></td> <td style="text-align: center;"><input type="checkbox"/></td> </tr> </table>                                                                                     |                                                                                                                                                                                                                                                   | <b>Femoral</b>                                                                                                                                                 | <b>Tibial</b> | <b>Stems</b>     |                  |                              | Cemented | <input type="checkbox"/>           | <input type="checkbox"/> | Cementless | <input type="checkbox"/> | <input type="checkbox"/> |                          | <b>Femoral</b>           | <b>Tibial</b> | <b>Augments</b>          |                          |                          | Metal      | <input type="checkbox"/> | <input type="checkbox"/> | Trabecular metal         | <input type="checkbox"/> | <input type="checkbox"/> | <b>Manufacturer</b><br>Femoral Stem<br><div style="border: 1px solid black; width: 50px; height: 50px; margin: 0 auto;"></div><br>Tibial Stem<br><div style="border: 1px solid black; width: 50px; height: 50px; margin: 0 auto;"></div> | Sticker(s) for Modular Femoral Stems<br><br><br>Sticker(s) for Modular Tibial Systems |
|                                                                                                                                                                                        | <b>Femoral</b>                                                                                                                                                                                                                                                                                                                                                                                                                                                                                                                                                                                                                                                                                                                                                                                                                                                                                                                                                                                                                                                                                                                                                                                                                                                                                                                         | <b>Tibial</b>                                                                                                                                                                                                                                     |                                                                                                                                                                |               |                  |                  |                              |          |                                    |                          |            |                          |                          |                          |                          |               |                          |                          |                          |            |                          |                          |                          |                          |                          |                                                                                                                                                                                                                                          |                                                                                       |
| <b>Stems</b>                                                                                                                                                                           |                                                                                                                                                                                                                                                                                                                                                                                                                                                                                                                                                                                                                                                                                                                                                                                                                                                                                                                                                                                                                                                                                                                                                                                                                                                                                                                                        |                                                                                                                                                                                                                                                   |                                                                                                                                                                |               |                  |                  |                              |          |                                    |                          |            |                          |                          |                          |                          |               |                          |                          |                          |            |                          |                          |                          |                          |                          |                                                                                                                                                                                                                                          |                                                                                       |
| Cemented                                                                                                                                                                               | <input type="checkbox"/>                                                                                                                                                                                                                                                                                                                                                                                                                                                                                                                                                                                                                                                                                                                                                                                                                                                                                                                                                                                                                                                                                                                                                                                                                                                                                                               | <input type="checkbox"/>                                                                                                                                                                                                                          |                                                                                                                                                                |               |                  |                  |                              |          |                                    |                          |            |                          |                          |                          |                          |               |                          |                          |                          |            |                          |                          |                          |                          |                          |                                                                                                                                                                                                                                          |                                                                                       |
| Cementless                                                                                                                                                                             | <input type="checkbox"/>                                                                                                                                                                                                                                                                                                                                                                                                                                                                                                                                                                                                                                                                                                                                                                                                                                                                                                                                                                                                                                                                                                                                                                                                                                                                                                               | <input type="checkbox"/>                                                                                                                                                                                                                          |                                                                                                                                                                |               |                  |                  |                              |          |                                    |                          |            |                          |                          |                          |                          |               |                          |                          |                          |            |                          |                          |                          |                          |                          |                                                                                                                                                                                                                                          |                                                                                       |
|                                                                                                                                                                                        | <b>Femoral</b>                                                                                                                                                                                                                                                                                                                                                                                                                                                                                                                                                                                                                                                                                                                                                                                                                                                                                                                                                                                                                                                                                                                                                                                                                                                                                                                         | <b>Tibial</b>                                                                                                                                                                                                                                     |                                                                                                                                                                |               |                  |                  |                              |          |                                    |                          |            |                          |                          |                          |                          |               |                          |                          |                          |            |                          |                          |                          |                          |                          |                                                                                                                                                                                                                                          |                                                                                       |
| <b>Augments</b>                                                                                                                                                                        |                                                                                                                                                                                                                                                                                                                                                                                                                                                                                                                                                                                                                                                                                                                                                                                                                                                                                                                                                                                                                                                                                                                                                                                                                                                                                                                                        |                                                                                                                                                                                                                                                   |                                                                                                                                                                |               |                  |                  |                              |          |                                    |                          |            |                          |                          |                          |                          |               |                          |                          |                          |            |                          |                          |                          |                          |                          |                                                                                                                                                                                                                                          |                                                                                       |
| Metal                                                                                                                                                                                  | <input type="checkbox"/>                                                                                                                                                                                                                                                                                                                                                                                                                                                                                                                                                                                                                                                                                                                                                                                                                                                                                                                                                                                                                                                                                                                                                                                                                                                                                                               | <input type="checkbox"/>                                                                                                                                                                                                                          |                                                                                                                                                                |               |                  |                  |                              |          |                                    |                          |            |                          |                          |                          |                          |               |                          |                          |                          |            |                          |                          |                          |                          |                          |                                                                                                                                                                                                                                          |                                                                                       |
| Trabecular metal                                                                                                                                                                       | <input type="checkbox"/>                                                                                                                                                                                                                                                                                                                                                                                                                                                                                                                                                                                                                                                                                                                                                                                                                                                                                                                                                                                                                                                                                                                                                                                                                                                                                                               | <input type="checkbox"/>                                                                                                                                                                                                                          |                                                                                                                                                                |               |                  |                  |                              |          |                                    |                          |            |                          |                          |                          |                          |               |                          |                          |                          |            |                          |                          |                          |                          |                          |                                                                                                                                                                                                                                          |                                                                                       |
| <b>Cement Details</b><br><br><b>Cement Used?</b><br><input type="checkbox"/> Yes →<br><input type="checkbox"/> No ↓                                                                    | <b>For each item, Check ONE only:</b><br><b>Cement Name:</b><br><input type="checkbox"/> Simplex <input type="checkbox"/> Zimmer <input type="checkbox"/> CMW <input type="checkbox"/> Versabond<br><input type="checkbox"/> Palacos <input type="checkbox"/> Osteobond <input type="checkbox"/> Cerafix <input type="checkbox"/> Other _____<br><b>Antibiotics Added by Manufacturer?</b> <input type="checkbox"/> Yes <input type="checkbox"/> No<br><b>Antibiotics Added by Surgeon?</b> <input type="checkbox"/> Yes <input type="checkbox"/> No<br><b>If Yes, Antibiotic Name:</b><br><input type="checkbox"/> Tobramycin <input type="checkbox"/> Vancomycin <input type="checkbox"/> Gentamicin <input type="checkbox"/> Erythromycin <input type="checkbox"/> Other<br><b>Mixing Method:</b> <input type="checkbox"/> Vacuum-mixed <input type="checkbox"/> Centrifuge <input type="checkbox"/> Manually Mixed                                                                                                                                                                                                                                                                                                                                                                                                                 |                                                                                                                                                                                                                                                   | Sticker for Cement Type                                                                                                                                        |               |                  |                  |                              |          |                                    |                          |            |                          |                          |                          |                          |               |                          |                          |                          |            |                          |                          |                          |                          |                          |                                                                                                                                                                                                                                          |                                                                                       |
| <b>Bone Graft Used—Femur</b><br><input type="checkbox"/> Yes →<br><input type="checkbox"/> No ↓                                                                                        | <b>Check ALL that apply:</b><br><table style="width:100%; border-collapse: collapse;"> <tr> <td style="width:20%;"></td> <td style="width:30%; text-align: center;"><u>Autograft</u></td> <td style="width:20%; text-align: center;"><u>Allograft</u></td> <td style="width:30%; text-align: center;"><u>Bone Graft Substitute</u></td> </tr> <tr> <td></td> <td style="text-align: center;">Iliac crest    Local bone    Other</td> <td></td> <td></td> </tr> <tr> <td>Structural</td> <td style="text-align: center;"><input type="checkbox"/></td> <td style="text-align: center;"><input type="checkbox"/></td> <td style="text-align: center;"><input type="checkbox"/></td> </tr> <tr> <td>Strut/Onlay</td> <td style="text-align: center;"><input type="checkbox"/></td> <td style="text-align: center;"><input type="checkbox"/></td> <td style="text-align: center;"><input type="checkbox"/></td> </tr> <tr> <td>Morselized</td> <td style="text-align: center;"><input type="checkbox"/></td> <td style="text-align: center;"><input type="checkbox"/></td> <td style="text-align: center;"><input type="checkbox"/></td> </tr> </table>                                                                                                                                                                                    |                                                                                                                                                                                                                                                   |                                                                                                                                                                |               | <u>Autograft</u> | <u>Allograft</u> | <u>Bone Graft Substitute</u> |          | Iliac crest    Local bone    Other |                          |            | Structural               | <input type="checkbox"/> | <input type="checkbox"/> | <input type="checkbox"/> | Strut/Onlay   | <input type="checkbox"/> | <input type="checkbox"/> | <input type="checkbox"/> | Morselized | <input type="checkbox"/> | <input type="checkbox"/> | <input type="checkbox"/> |                          |                          |                                                                                                                                                                                                                                          |                                                                                       |
|                                                                                                                                                                                        | <u>Autograft</u>                                                                                                                                                                                                                                                                                                                                                                                                                                                                                                                                                                                                                                                                                                                                                                                                                                                                                                                                                                                                                                                                                                                                                                                                                                                                                                                       | <u>Allograft</u>                                                                                                                                                                                                                                  | <u>Bone Graft Substitute</u>                                                                                                                                   |               |                  |                  |                              |          |                                    |                          |            |                          |                          |                          |                          |               |                          |                          |                          |            |                          |                          |                          |                          |                          |                                                                                                                                                                                                                                          |                                                                                       |
|                                                                                                                                                                                        | Iliac crest    Local bone    Other                                                                                                                                                                                                                                                                                                                                                                                                                                                                                                                                                                                                                                                                                                                                                                                                                                                                                                                                                                                                                                                                                                                                                                                                                                                                                                     |                                                                                                                                                                                                                                                   |                                                                                                                                                                |               |                  |                  |                              |          |                                    |                          |            |                          |                          |                          |                          |               |                          |                          |                          |            |                          |                          |                          |                          |                          |                                                                                                                                                                                                                                          |                                                                                       |
| Structural                                                                                                                                                                             | <input type="checkbox"/>                                                                                                                                                                                                                                                                                                                                                                                                                                                                                                                                                                                                                                                                                                                                                                                                                                                                                                                                                                                                                                                                                                                                                                                                                                                                                                               | <input type="checkbox"/>                                                                                                                                                                                                                          | <input type="checkbox"/>                                                                                                                                       |               |                  |                  |                              |          |                                    |                          |            |                          |                          |                          |                          |               |                          |                          |                          |            |                          |                          |                          |                          |                          |                                                                                                                                                                                                                                          |                                                                                       |
| Strut/Onlay                                                                                                                                                                            | <input type="checkbox"/>                                                                                                                                                                                                                                                                                                                                                                                                                                                                                                                                                                                                                                                                                                                                                                                                                                                                                                                                                                                                                                                                                                                                                                                                                                                                                                               | <input type="checkbox"/>                                                                                                                                                                                                                          | <input type="checkbox"/>                                                                                                                                       |               |                  |                  |                              |          |                                    |                          |            |                          |                          |                          |                          |               |                          |                          |                          |            |                          |                          |                          |                          |                          |                                                                                                                                                                                                                                          |                                                                                       |
| Morselized                                                                                                                                                                             | <input type="checkbox"/>                                                                                                                                                                                                                                                                                                                                                                                                                                                                                                                                                                                                                                                                                                                                                                                                                                                                                                                                                                                                                                                                                                                                                                                                                                                                                                               | <input type="checkbox"/>                                                                                                                                                                                                                          | <input type="checkbox"/>                                                                                                                                       |               |                  |                  |                              |          |                                    |                          |            |                          |                          |                          |                          |               |                          |                          |                          |            |                          |                          |                          |                          |                          |                                                                                                                                                                                                                                          |                                                                                       |
| <b>Bone Graft Used—Tibial</b><br><input type="checkbox"/> Yes →<br><input type="checkbox"/> No ↓                                                                                       | <b>Check ALL that apply:</b><br><table style="width:100%; border-collapse: collapse;"> <tr> <td style="width:20%;"></td> <td style="width:30%; text-align: center;"><u>Autograft</u></td> <td style="width:20%; text-align: center;"><u>Allograft</u></td> <td style="width:30%; text-align: center;"><u>Bone Graft Substitute</u></td> </tr> <tr> <td></td> <td style="text-align: center;">Iliac crest    Local bone    Other</td> <td></td> <td></td> </tr> <tr> <td>Structural</td> <td style="text-align: center;"><input type="checkbox"/></td> <td style="text-align: center;"><input type="checkbox"/></td> <td style="text-align: center;"><input type="checkbox"/></td> </tr> <tr> <td>Strut/Onlay</td> <td style="text-align: center;"><input type="checkbox"/></td> <td style="text-align: center;"><input type="checkbox"/></td> <td style="text-align: center;"><input type="checkbox"/></td> </tr> <tr> <td>Morselized</td> <td style="text-align: center;"><input type="checkbox"/></td> <td style="text-align: center;"><input type="checkbox"/></td> <td style="text-align: center;"><input type="checkbox"/></td> </tr> </table>                                                                                                                                                                                    |                                                                                                                                                                                                                                                   |                                                                                                                                                                |               | <u>Autograft</u> | <u>Allograft</u> | <u>Bone Graft Substitute</u> |          | Iliac crest    Local bone    Other |                          |            | Structural               | <input type="checkbox"/> | <input type="checkbox"/> | <input type="checkbox"/> | Strut/Onlay   | <input type="checkbox"/> | <input type="checkbox"/> | <input type="checkbox"/> | Morselized | <input type="checkbox"/> | <input type="checkbox"/> | <input type="checkbox"/> |                          |                          |                                                                                                                                                                                                                                          |                                                                                       |
|                                                                                                                                                                                        | <u>Autograft</u>                                                                                                                                                                                                                                                                                                                                                                                                                                                                                                                                                                                                                                                                                                                                                                                                                                                                                                                                                                                                                                                                                                                                                                                                                                                                                                                       | <u>Allograft</u>                                                                                                                                                                                                                                  | <u>Bone Graft Substitute</u>                                                                                                                                   |               |                  |                  |                              |          |                                    |                          |            |                          |                          |                          |                          |               |                          |                          |                          |            |                          |                          |                          |                          |                          |                                                                                                                                                                                                                                          |                                                                                       |
|                                                                                                                                                                                        | Iliac crest    Local bone    Other                                                                                                                                                                                                                                                                                                                                                                                                                                                                                                                                                                                                                                                                                                                                                                                                                                                                                                                                                                                                                                                                                                                                                                                                                                                                                                     |                                                                                                                                                                                                                                                   |                                                                                                                                                                |               |                  |                  |                              |          |                                    |                          |            |                          |                          |                          |                          |               |                          |                          |                          |            |                          |                          |                          |                          |                          |                                                                                                                                                                                                                                          |                                                                                       |
| Structural                                                                                                                                                                             | <input type="checkbox"/>                                                                                                                                                                                                                                                                                                                                                                                                                                                                                                                                                                                                                                                                                                                                                                                                                                                                                                                                                                                                                                                                                                                                                                                                                                                                                                               | <input type="checkbox"/>                                                                                                                                                                                                                          | <input type="checkbox"/>                                                                                                                                       |               |                  |                  |                              |          |                                    |                          |            |                          |                          |                          |                          |               |                          |                          |                          |            |                          |                          |                          |                          |                          |                                                                                                                                                                                                                                          |                                                                                       |
| Strut/Onlay                                                                                                                                                                            | <input type="checkbox"/>                                                                                                                                                                                                                                                                                                                                                                                                                                                                                                                                                                                                                                                                                                                                                                                                                                                                                                                                                                                                                                                                                                                                                                                                                                                                                                               | <input type="checkbox"/>                                                                                                                                                                                                                          | <input type="checkbox"/>                                                                                                                                       |               |                  |                  |                              |          |                                    |                          |            |                          |                          |                          |                          |               |                          |                          |                          |            |                          |                          |                          |                          |                          |                                                                                                                                                                                                                                          |                                                                                       |
| Morselized                                                                                                                                                                             | <input type="checkbox"/>                                                                                                                                                                                                                                                                                                                                                                                                                                                                                                                                                                                                                                                                                                                                                                                                                                                                                                                                                                                                                                                                                                                                                                                                                                                                                                               | <input type="checkbox"/>                                                                                                                                                                                                                          | <input type="checkbox"/>                                                                                                                                       |               |                  |                  |                              |          |                                    |                          |            |                          |                          |                          |                          |               |                          |                          |                          |            |                          |                          |                          |                          |                          |                                                                                                                                                                                                                                          |                                                                                       |

**Legend of Manufacturer Codes:**    01 Biomet    03 J&J/DePuy    05 Zimmer    07 Smith & Nephew Richards    99 Other  
                                                           02 Ceraver    04 Sulzer/Centerpulse    06 Wright Medical    08 Stryker/Osteonic/Howmedica
